# Supplementary material
Source: PubMed Central journal article supplement (PMC2756102)
Supplement: NIHMS132294-supplement-supp.pdf [file NIHMS132294-supplement-supp.pdf]

Murphy Supplementary fig.1

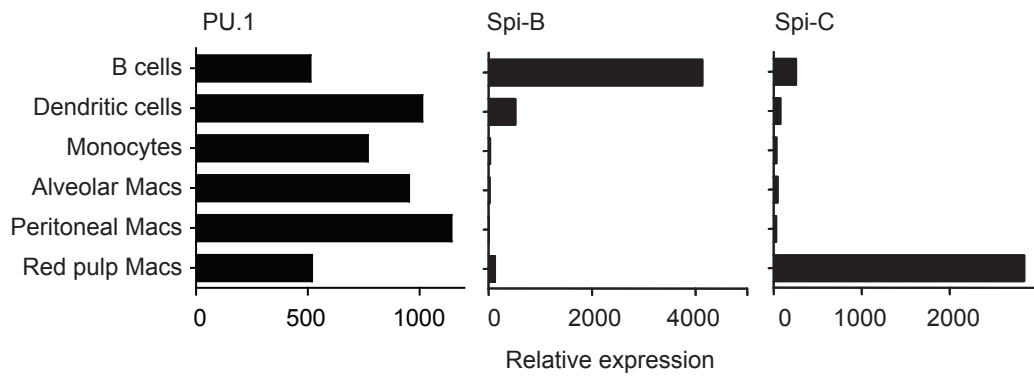

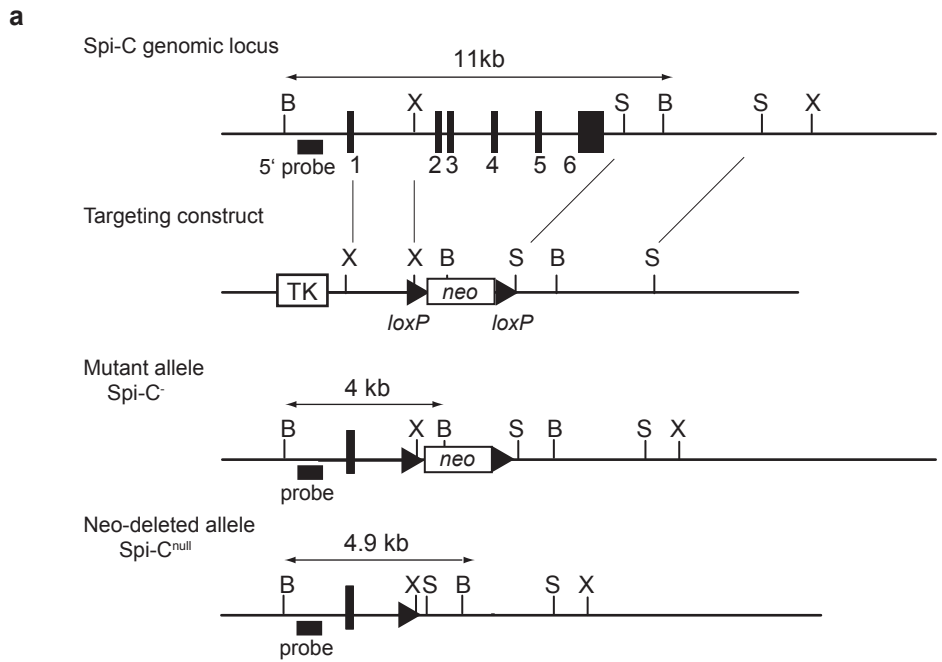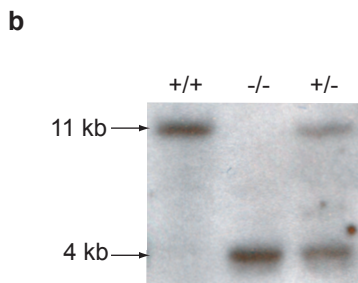

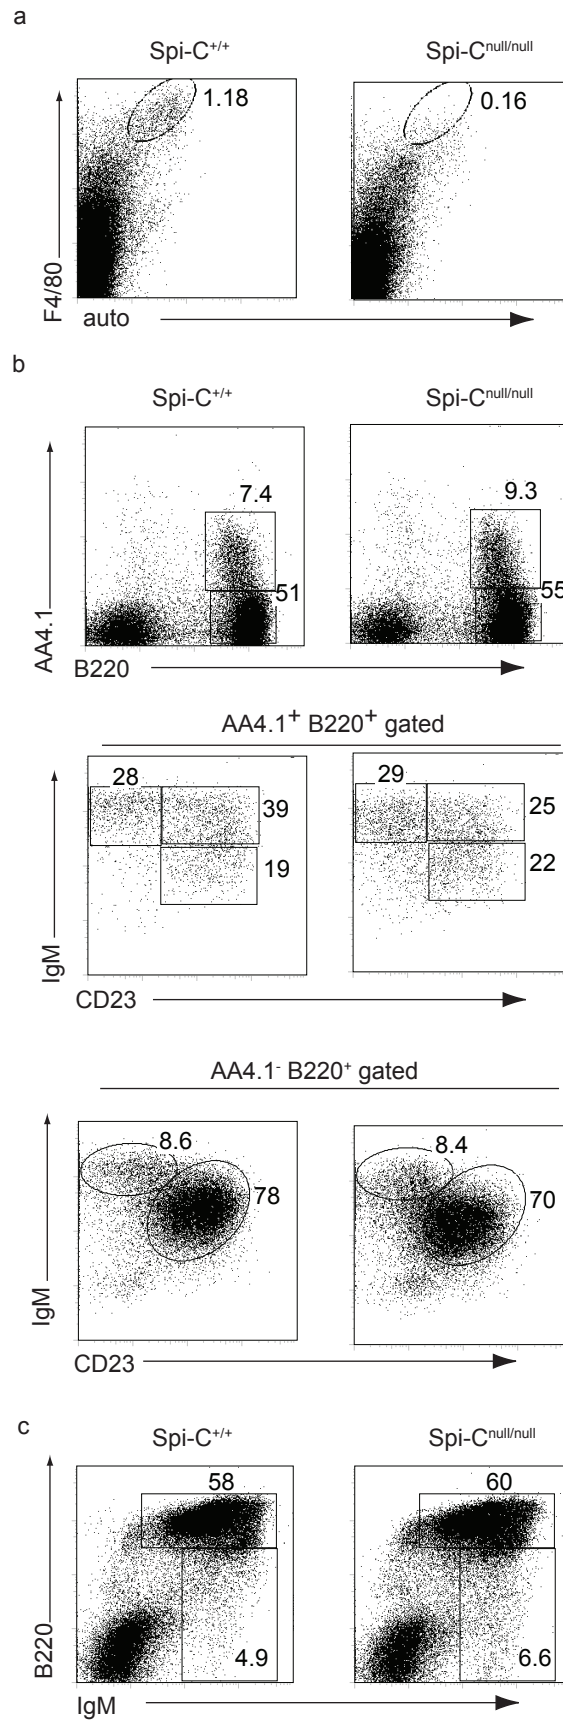

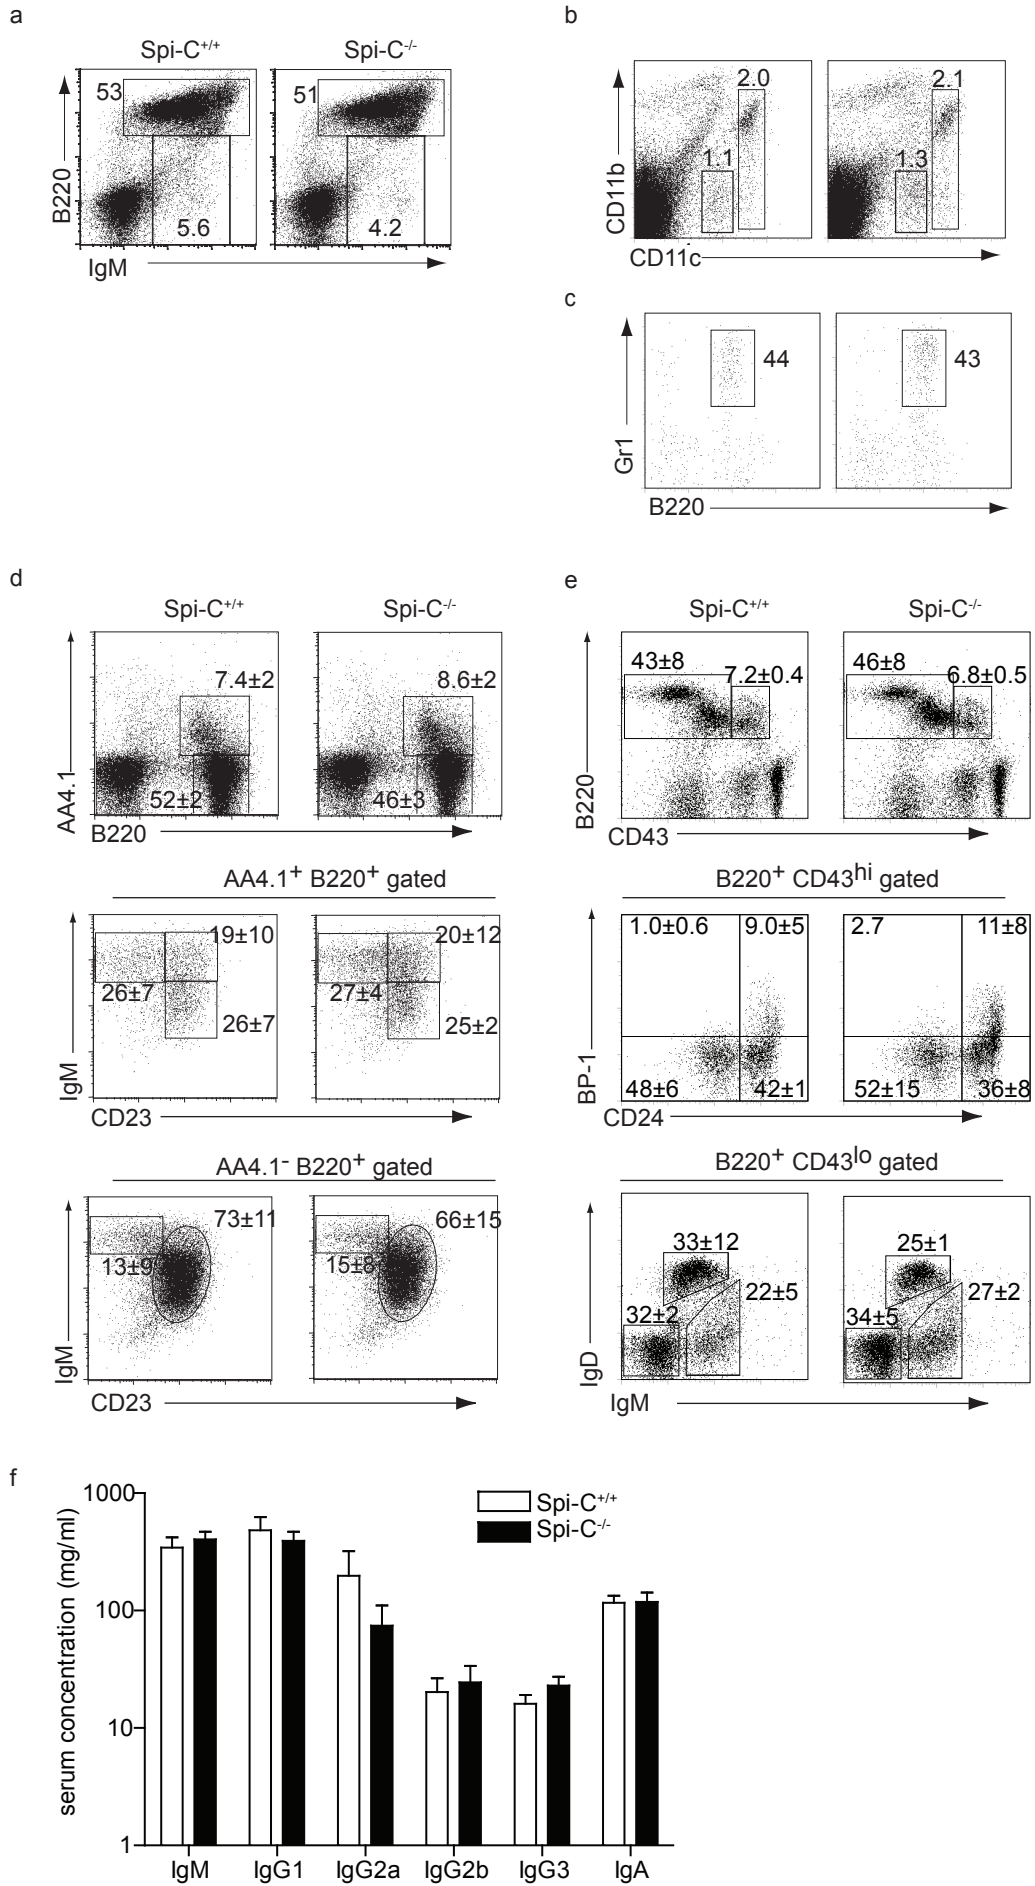

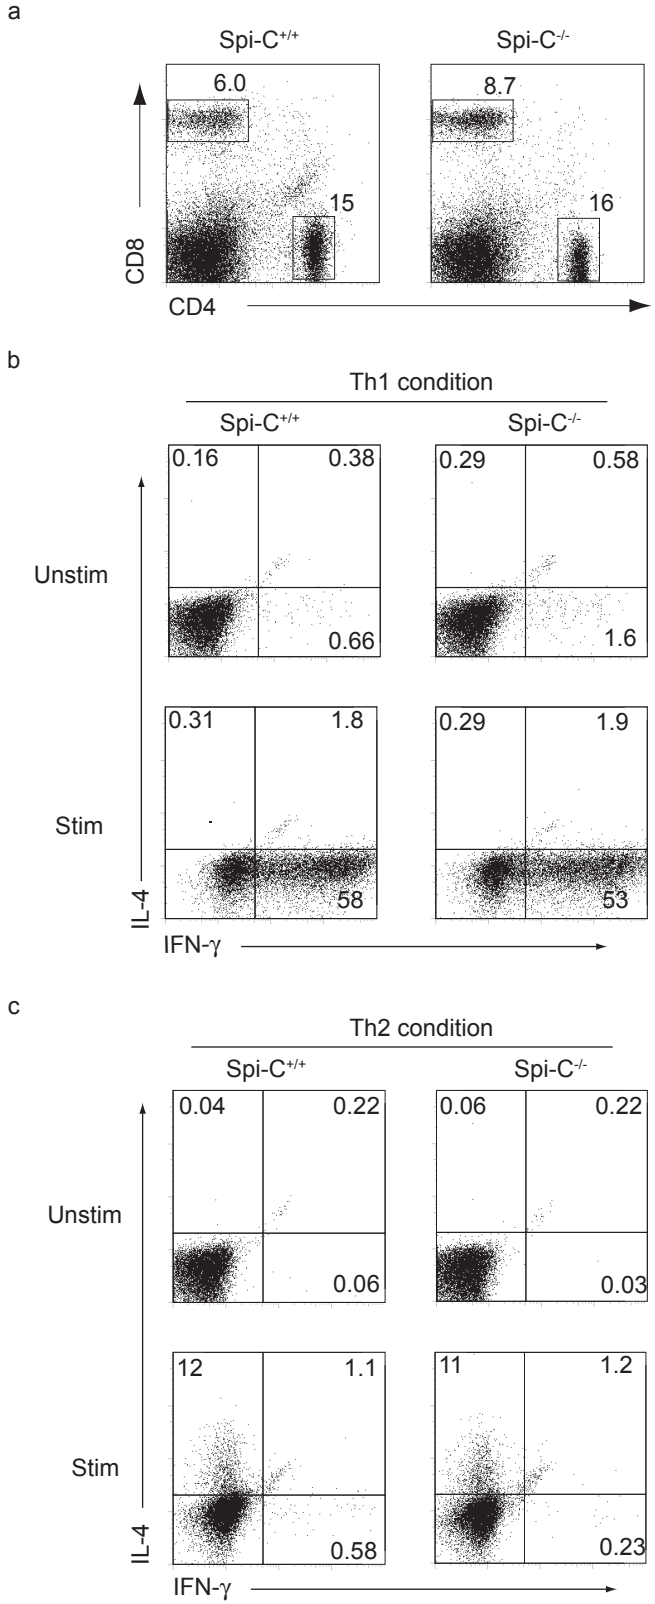

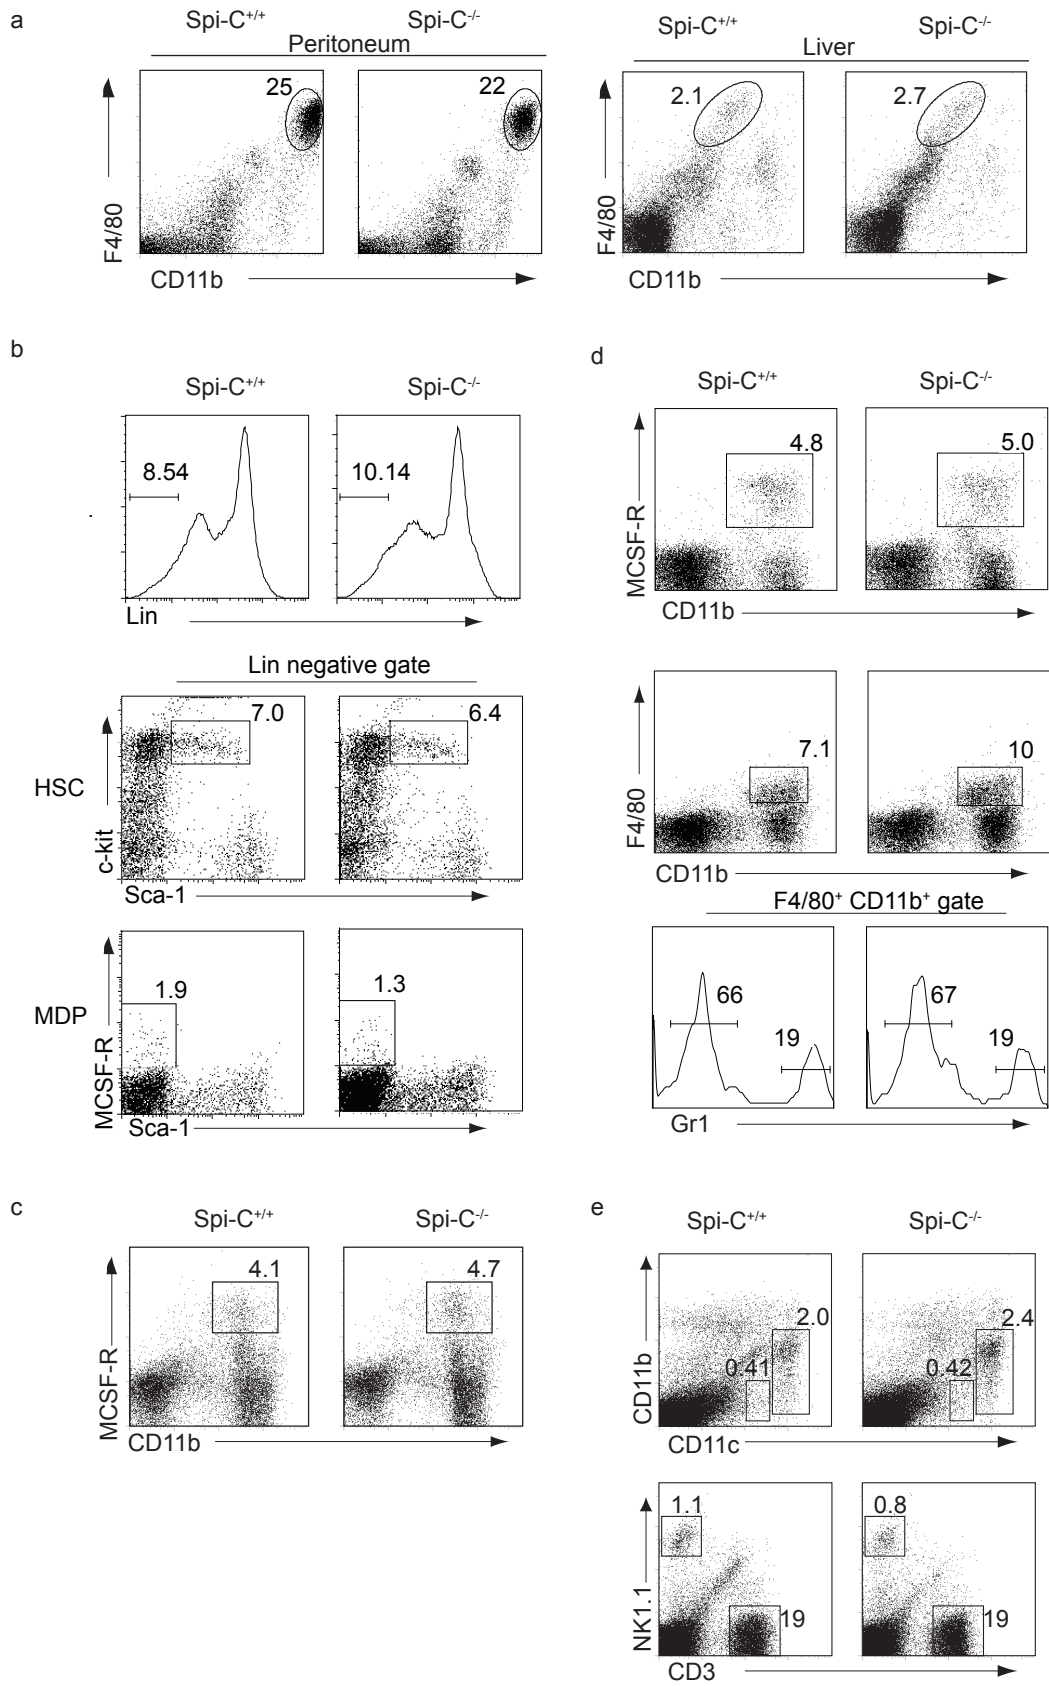

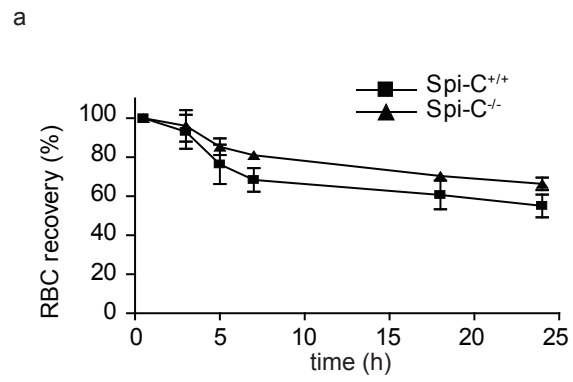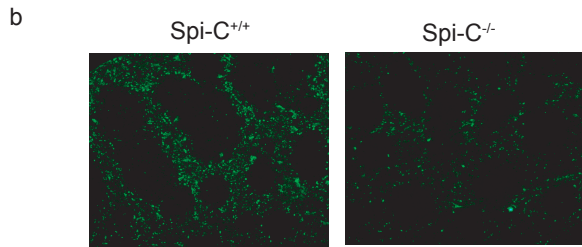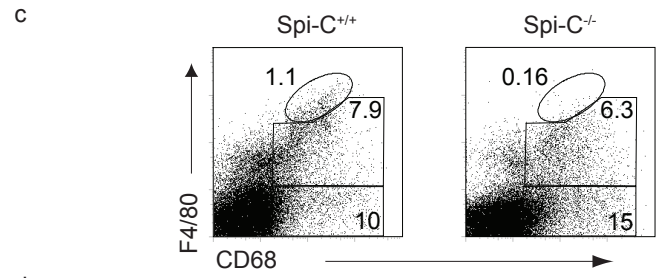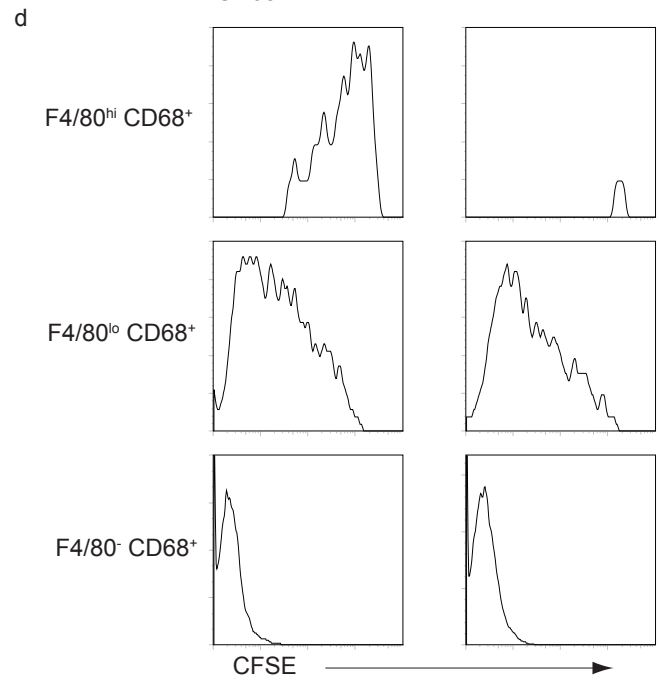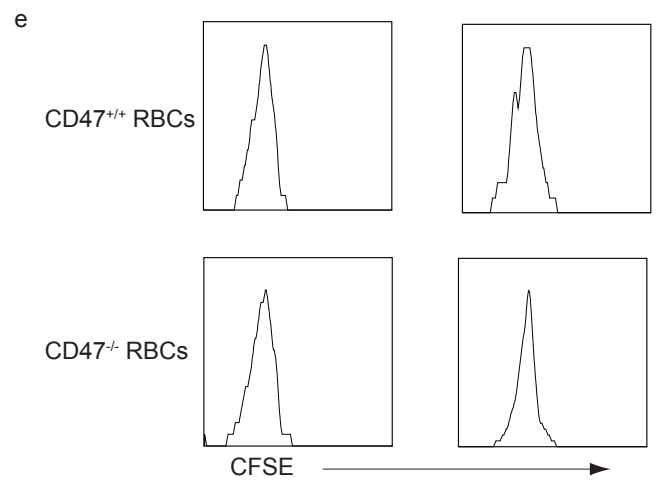

Murphy Supplementary fig.8

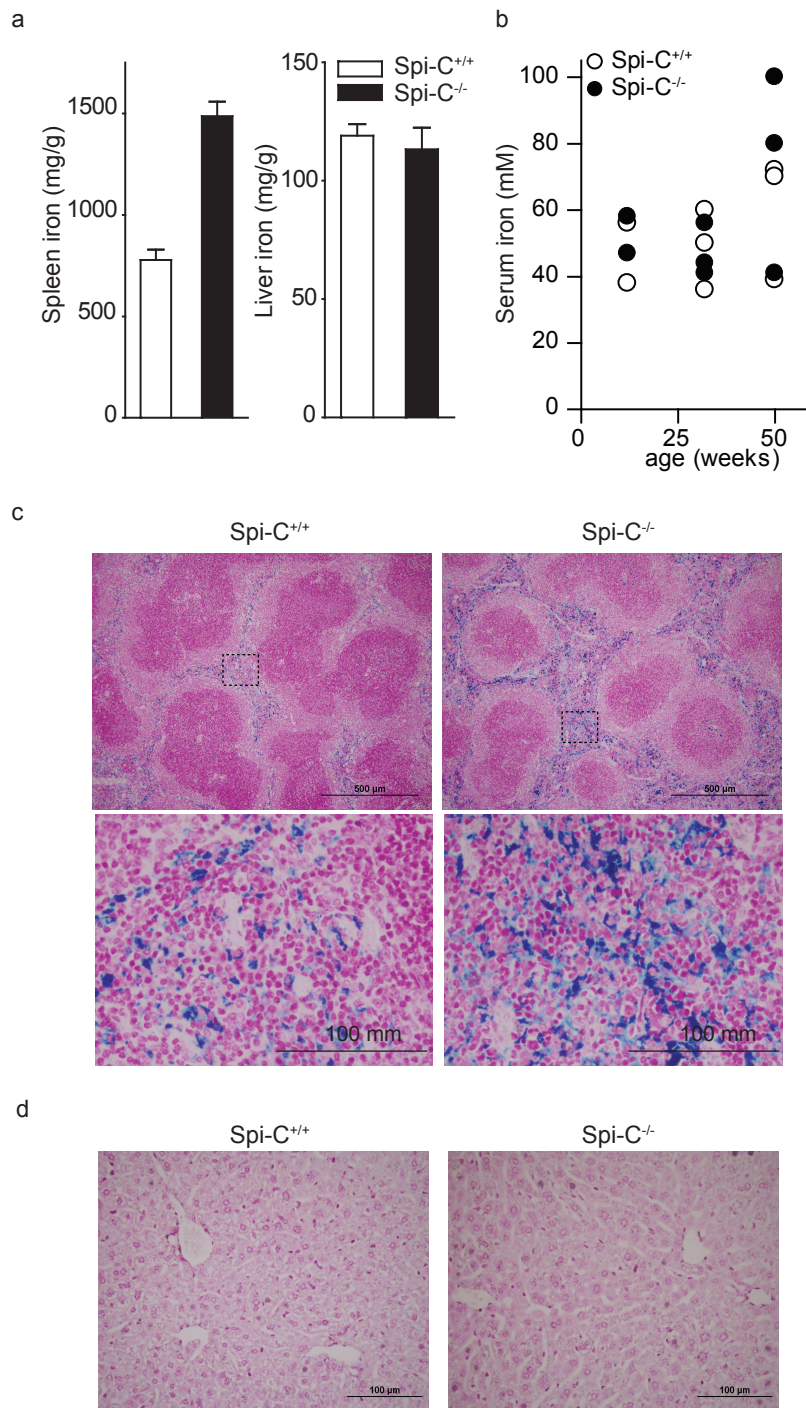



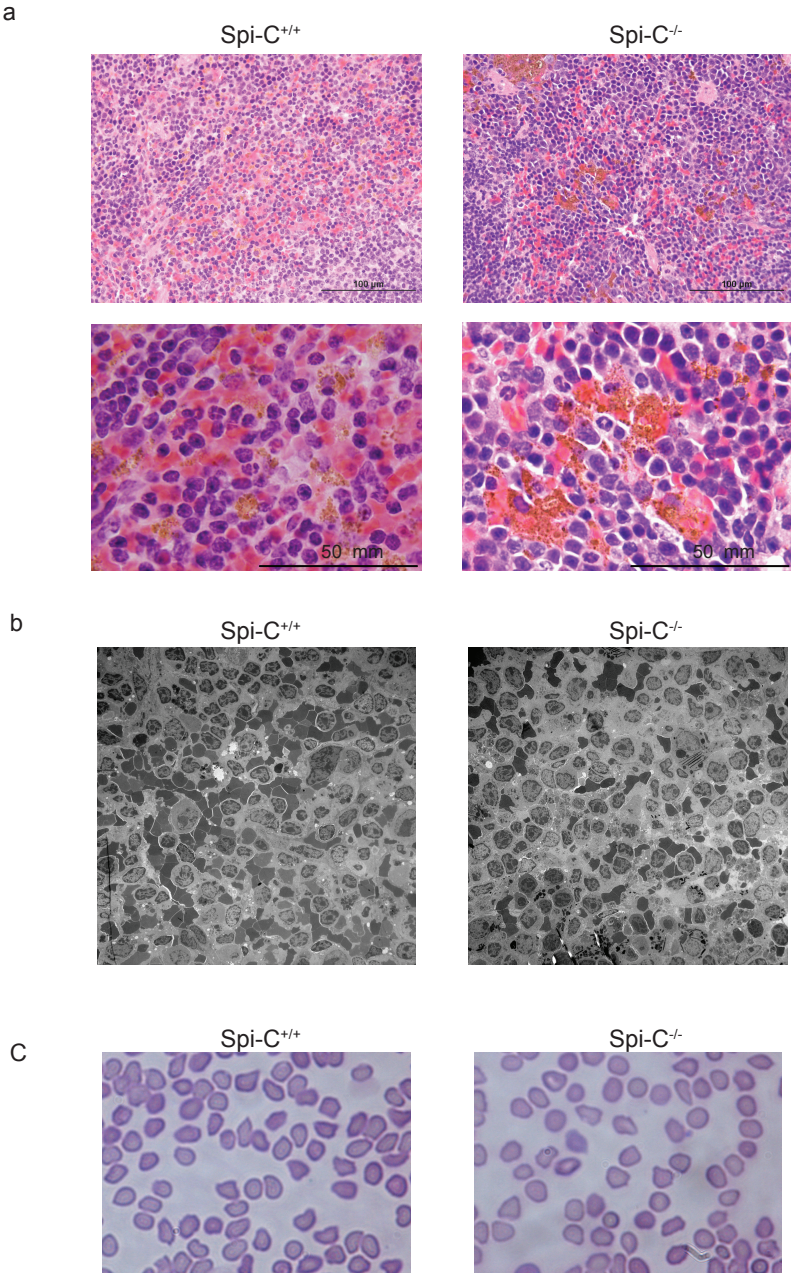

a

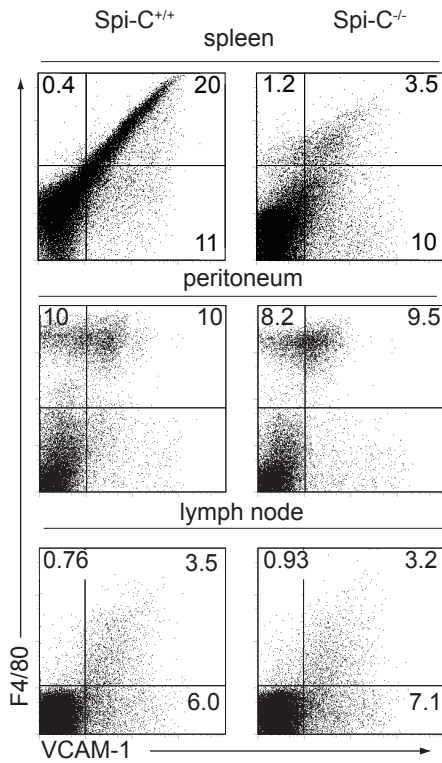

b

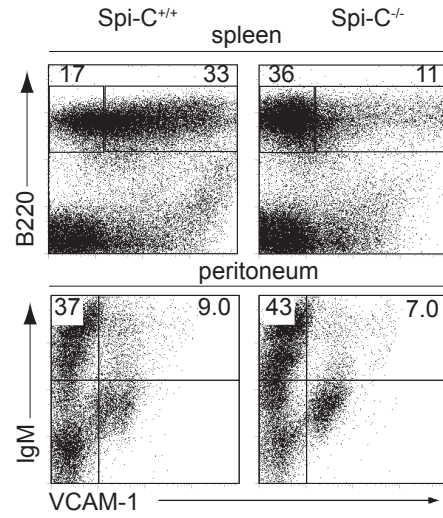

d

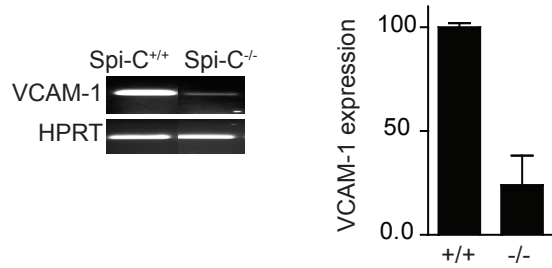

c

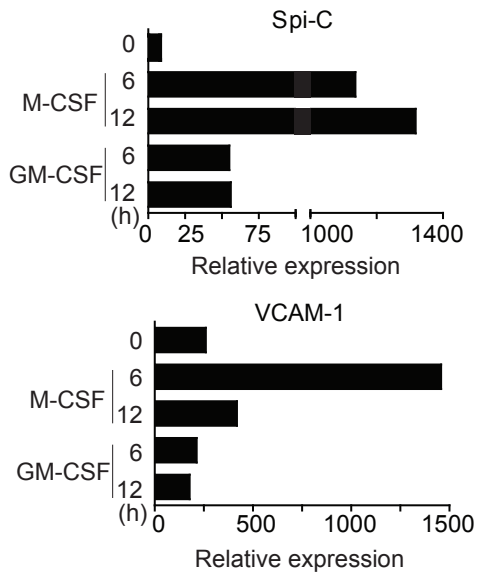

e

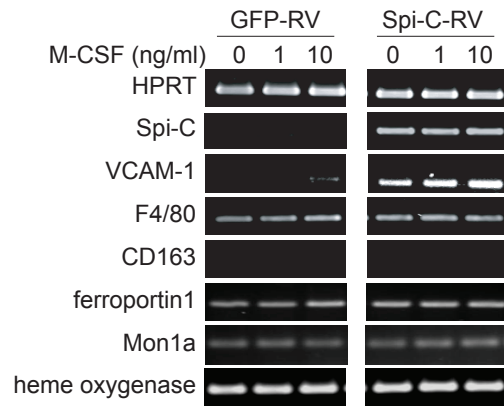

f

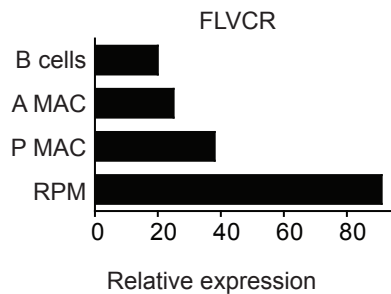

Supplementary Table 1-a. B cell subsets in bone marrow

|         | Fr.A-C               |                      | Fr.D-F               |                      | Fr.A                 |                      | Fr.B                 |                      | Fr.C                 |                      | Fr.D                 |                      | Fr.E                 |                      | Fr.F                 |                      |
|---------|----------------------|----------------------|----------------------|----------------------|----------------------|----------------------|----------------------|----------------------|----------------------|----------------------|----------------------|----------------------|----------------------|----------------------|----------------------|----------------------|
|         | Spi-C <sup>+/+</sup> | Spi-C <sup>-/-</sup> |
| exp.1   | 35.9                 | 36.8                 | 6.7                  | 6.5                  | 44.1                 | 38.8                 | 42.0                 | 42.8                 | 12.1                 | 16.8                 | 32.9                 | 40.3                 | 17.0                 | 26.0                 | 45.7                 | 26.1                 |
| exp.2   | 36.4                 | 42.2                 | 7.6                  | 7.3                  | 42.0                 | 36.7                 | 44.1                 | 42.3                 | 12.9                 | 18.8                 | 31.6                 | 35.6                 | 20.6                 | 30.0                 | 39.6                 | 26.0                 |
| exp.3   | 50.9                 | 51.3                 | 7.5                  | 7.2                  | 54.4                 | 70.7                 | 41.3                 | 26.0                 | 4.0                  | 3.5                  | 34.4                 | 30.1                 | 26.0                 | 27.0                 | 20.8                 | 24.0                 |
| exp.4   | 49.2                 | 54.9                 | 7.3                  | 6.3                  | 50.6                 | 60.5                 | 43.9                 | 34.0                 | 5.0                  | 5.1                  | 30.7                 | 30.1                 | 26.0                 | 27.0                 | 24.6                 | 24.0                 |
| average | 43.1                 | 46.3                 | 7.3                  | 6.8                  | 47.8                 | 51.7                 | 42.8                 | 36.3                 | 8.5                  | 11.1                 | 32.4                 | 34.0                 | 22.4                 | 27.5                 | 32.7                 | 25.0                 |
| SD      | 8.1                  | 8.3                  | 0.4                  | 0.5                  | 5.7                  | 16.6                 | 1.4                  | 8.0                  | 4.6                  | 7.9                  | 1.6                  | 4.9                  | 4.4                  | 1.7                  | 11.9                 | 1.2                  |

Bone marrow cells from Spi-C<sup>+/+</sup> and Spi-C<sup>-/-</sup> mice were stained for B220, CD43, BP-1 and CD24, or IgM and IgD, to identify B cell development subsets. Fr.A-C (B220<sup>+</sup> CD43<sup>+</sup>), Fr.D-F (B220<sup>+</sup>, CD43<sup>-</sup>), Fr.A (B220<sup>+</sup> CD43<sup>+</sup> BP-1<sup>-</sup> CD24<sup>-</sup>), Fr.B (B220<sup>+</sup> CD43<sup>+</sup> BP-1<sup>-</sup> CD24<sup>+</sup>), Fr.C (B220<sup>+</sup> CD43<sup>+</sup> BP-1<sup>+</sup> CD24<sup>+</sup>), Fr.D (B220<sup>+</sup> CD43<sup>-</sup> IgM<sup>+</sup> IgD<sup>lo</sup>), Fr.E (B220<sup>+</sup> CD43<sup>-</sup> IgM<sup>+</sup> IgD<sup>lo</sup>), Fr.F (B220<sup>+</sup> CD43<sup>-</sup> IgM<sup>lo</sup> IgD<sup>hi</sup>).

Supplementary Table 1-b. B cell subsets in spleen

|         | Immature T1          |                      | Immature T2          |                      | Immature T3          |                      | Marginal zone B      |                      | Follicular B         |                      |
|---------|----------------------|----------------------|----------------------|----------------------|----------------------|----------------------|----------------------|----------------------|----------------------|----------------------|
|         | Spi-C <sup>+/+</sup> | Spi-C <sup>-/-</sup> |
| exp.1   | 16.6                 | 23                   | 31.2                 | 33                   | 35                   | 26                   | 4.9                  | 8.5                  | 84                   | 78                   |
| exp.2   | 26.6                 | 25                   | 25.2                 | 28                   | 28                   | 27                   | 6.7                  | 7.8                  | 81                   | 80                   |
| exp.3   | 29                   | 30                   | 13.5                 | 10                   | 24                   | 23                   | 16                   | 22                   | 66                   | 56                   |
| exp.4   | 34                   | 32                   | 7.2                  | 10                   | 18                   | 22                   | 24                   | 22                   | 60                   | 51                   |
| average | 26.6                 | 27.5                 | 19.3                 | 20.3                 | 26.3                 | 24.5                 | 12.9                 | 15.1                 | 72.8                 | 66.3                 |
| SD      | 7.3                  | 4.2                  | 10.9                 | 12.0                 | 7.1                  | 2.4                  | 8.9                  | 8.0                  | 11.6                 | 14.9                 |

Spleen cells from Spi-C<sup>+/+</sup> and Spi-C<sup>-/-</sup> mice were stained for B220, CD23, AA4.1, and IgM to identify B cell development subsets. Immature transitional 1 B (T1) (B220<sup>+</sup> AA4.1<sup>+</sup> IgM<sup>+</sup> CD23<sup>-</sup>), immature T2 (B220<sup>+</sup> AA4.1<sup>+</sup> IgM<sup>+</sup> CD23<sup>+</sup>), immature T3 (B220<sup>+</sup> AA4.1<sup>+</sup> IgM<sup>-</sup> CD23<sup>+</sup>), marginal zone B (B220<sup>+</sup> AA4.1<sup>-</sup> IgM<sup>+</sup> CD23<sup>-</sup>), follicular B (B220<sup>+</sup> AA4.1<sup>-</sup> IgM<sup>lo</sup> CD23<sup>+</sup>).

Supplementary Table 2. Erythroid parameters

| mice                 | n | RBC<br>10 <sup>6</sup> /mm <sup>3</sup> | Hb<br>g/dl  | Hct<br>%    | MCV<br>fl   | PLAT<br>thsu/cu mm |
|----------------------|---|-----------------------------------------|-------------|-------------|-------------|--------------------|
| Spi-C <sup>+/+</sup> | 6 | 9.35 ± 0.59                             | 14.7 ± 0.72 | 51.4 ± 2.27 | 55.2 ± 4.50 | 695 ± 89           |
| Spi-C <sup>-/-</sup> | 6 | 9.51 ± 0.10                             | 14.8 ± 0.74 | 51.9 ± 4.43 | 54.8 ± 4.24 | 693 ± 19           |

Red blood cells (RBC), hemoglobin concentration (Hb), hematocrit (Hct), mean corpuscular volume (MCV) and platelet counts (PLAT) analyzed in Spi-C<sup>+/+</sup> and Spi-C<sup>-/-</sup> female mice at 10 to 16 weeks of age. Data are presented as mean ± SD.
